# Supplementary material for: Design of modular gellan gum hydrogel functionalized with avidin and biotinylated adhesive ligands for cell culture applications
Source: PLOS journal article supplement (doi:10.1371/journal.pone.0221931), 2019-08-30

### S3 Appendix. Compression data and curves of functionalized and non-functionalized samples.

Data are the same as presented in Fig. 4B and are presented as means  $\pm$  SD. The graphs (stress vs. strain) show all compression curves, from which the fracture points are averaged. The photograph shows cylindrical hydrogel samples, cell-free but incubated in DMEM.

| Sample description               | Fracture Strength [kPa] | Fracture Strain [%] | <i>n</i> |
|----------------------------------|-------------------------|---------------------|----------|
| NaGG + SPD                       | 4.3 $\pm$ 1.1           | 32.7 $\pm$ 6.5      | 5        |
| NaGG + CaCl <sub>2</sub>         | 5.1 $\pm$ 0.8           | 45.5 $\pm$ 1.0      | 5        |
| NaGG-avd (L) + SPD               | 5.5 $\pm$ 0.7           | 35.9 $\pm$ 4.0      | 5        |
| NaGG-avd (L) + CaCl <sub>2</sub> | 8.6 $\pm$ 1.0           | 45.7 $\pm$ 2.2      | 5        |
| NaGG-avd (H) + SPD               | 6.4 $\pm$ 1.2           | 36.5 $\pm$ 5.6      | 4        |
| NaGG-avd DMEM on gel             | 11.5 $\pm$ 0.8          | 37.6 $\pm$ 3.5      | 5        |

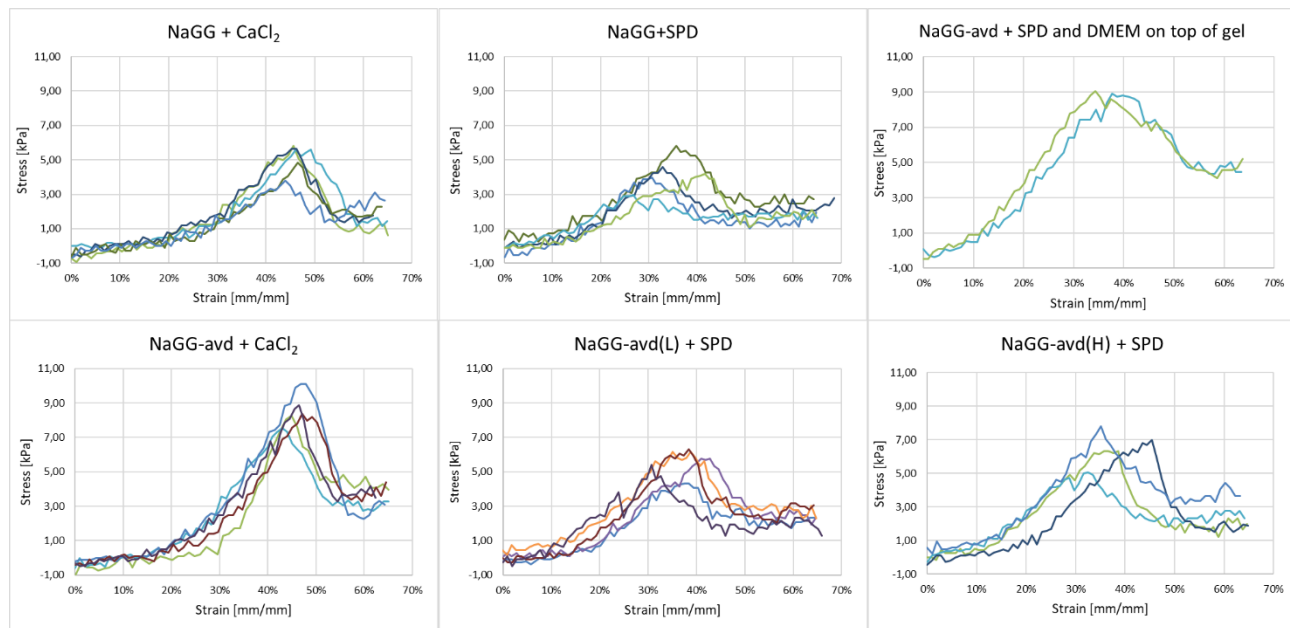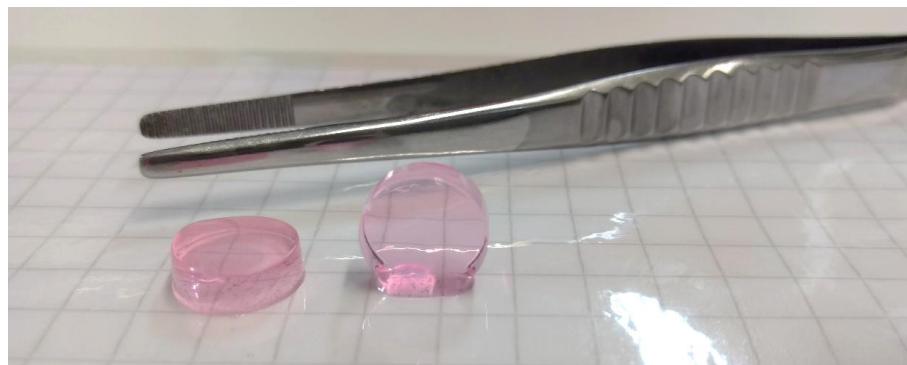

Supplement: S3 (10.1371/journal.pone.0221931.s003) [file journal.pone.0221931.s003]
