# Supplementary material for: Design of modular gellan gum hydrogel functionalized with avidin and biotinylated adhesive ligands for cell culture applications
Source: PLOS journal article supplement (doi:10.1371/journal.pone.0221931), 2019-08-30
Supplement: S6 (10.1371/journal.pone.0221931.s006) [file journal.pone.0221931.s006]

## **S6 Appendix. Flow cytometry surface markers analysis results of hBMSCs**

Following stem cell isolation, the undifferentiated human bone marrow stem cells (hBMSCs) of passage 3 were characterized. Briefly, hBMSCs were analyzed for the cell surface markers with flow cytometry (FACSARIA; BD Biosciences, Franklin Lakes, NJ, USA). The following fluorophore-conjugated monoclonal antibodies were used: anti-CD3-PE, anti-CD14-PECy7, anti-CD19-PE-Cy7, anti-CD45RO-APC, anti-CD73-PE, anti-CD90-APC (BD Biosciences), anti-CD11a-APC, anti-CD105-PE (R&D Systems, Minneapolis, MN, USA), CD34-APC, and anti-HLA-DR-PE (ImmunoTools, Friesoythe, Germany). Flow cytometry analysis was performed with 10,000 cells per sample, and the positive expression was defined as a level of fluorescence 99 % greater than that of the corresponding unstained cell sample (56, 57). In the analysis, the majority of hBMSCs expressed the surface markers CD73, CD90, CD105, and HLA-DR while expression of CD3, CD11a, CD14, CD19, CD34, and CD45 was low (Table S3).

**Flow cytometry surface markers analysis results of hBMSCs. n=1.** The flow cytometry analysis confirmed the mesenchymal origin of the hBMSCs.

| Antigen | Surface protein                                        |      |
|---------|--------------------------------------------------------|------|
| CD 3    | T cell signal transduction                             | 1.0  |
| CD 11a  | Cell interactions and T cell mediated killing          | 0.4  |
| CD 14   | Innate immune response to bacterial lipopolysaccharide | 4.6  |
| CD 19   | B lymphocyte-lineage differentiation antigen           | 3.4  |
| CD 34   | Sialomucin-like adhesion molecule                      | 2.3  |
| CD 45   | Leukocyte common antigen                               | 6.4  |
| CD 73   | Ecto-5'-nucleotidase                                   | 89.1 |
| CD 90   | Thy-1 (T cell surface glycoprotein)                    | 81.5 |
| CD 105  | SH-2, endoglin                                         | 86.5 |
| HLA-DR  | Major histocompatibility class II antigens             | 76.4 |

## **References**

55. M.J. Jaroszeski & G. Radcliff, Fundamentals of flow cytometry, Mol.Biotechnol., 11 No. 1 (1999) 37-53. 10.1007/BF02789175.
56. J. Picot, C.L. Guerin, C. Le Van Kim, C.M. Boulanger, Flow cytometry: retrospective, fundamentals and recent instrumentation, Cytotechnology, 64 No. 2 (2012) 109-130. 10.1007/s10616-011-9415-0; 10.1007/s10616-011-9415-0.
